# Supplementary material for: Age-Related Degree and Criteria Differences in Semantic Categorization
Source: J Cogn. 2019 Jul 19;2(1):17. doi: 10.5334/joc.74 (PMC6640261; doi:10.5334/joc.74)
Supplement: Appendix A. — Overview of the materials in English (materials were presented in Dutch). Indices m, f, and e indicate items that function differently in young and older adults for the Male, Female, and Female Education Equated data, respectively. Superscripted indices indicate items that were more often endorsed by the older than by the young adults. Subscripted indices indicate items that were more often endorsed by the young than by the older adults. [file joc-2-1-74-s1.pdf]

Appendix A: Overview of the materials in English (materials were presented in Dutch). Indices *m*, *f*, and *e* indicate items that function differently in young and older adults for the Male, Female, and Female Education Equated data, respectively. Superscripted indices indicate items that were more often endorsed by the older than by the young adults. Subscripted indices indicate items that were more often endorsed by the young than by the older adults.

| FISH                      | INSECTS                    | FURNITURE                 | TOOLS                        | FRUIT                    | VEGETABLES             | SCIENCES               | SPORTS                  |
|---------------------------|----------------------------|---------------------------|------------------------------|--------------------------|------------------------|------------------------|-------------------------|
| alligator                 | amoeba                     | ashtray                   | axe                          | acorn                    | apple                  | advertising            | aerobics <sub>f,e</sub> |
| catfish                   | ant                        | bed                       | broom <sup>f</sup>           | almond <sup>m,e</sup>    | artichoke              | agriculture            | ballroom                |
| clam                      | bacterium                  | book                      | calculator                   | avocado                  | asparagus              | archaeology            | dancing <sub>f,e</sub>  |
| crab                      | bat                        | bookends                  | dictionary                   | banana                   | bamboo shoot           | architecture           | billiards               |
| eel                       | caterpillar                | bucket                    | funnel                       | carrot                   | bread                  | astrology <sup>m</sup> | bridge                  |
| frog                      | centipede                  | chair                     | hammer                       | coconut <sub>f</sub>     | celery                 | astronomy              | bullfighting            |
| goldfish                  | dust mite <sup>m,f,e</sup> | curtains                  | key                          | cucumber                 | cereal                 | chemistry              | chess                   |
| gull                      | earthworm <sub>m,f,e</sub> | cushion <sub>m,f,e</sub>  | pen <sup>e</sup>             | date <sup>e</sup>        | chili pepper           | criminology            | conversation            |
| jellyfish <sub>f,e</sub>  | grasshopper                | desk                      | photograph                   | eggplant                 | cloves                 | dentistry              | croquet                 |
| lobster                   | hamster                    | dishwasher                | pitchfork                    | ginger                   | dandelion              | economics              | crosswords              |
| oyster                    | head lice <sup>f,e</sup>   | door mat <sub>f</sub>     | rake                         | mint                     | garlic                 | geography              | darts                   |
| plankton <sub>m,f,e</sub> | leech                      | lamp <sub>f,e</sub>       | scalpel                      | mushroom                 | lettuce                | geometry               | fishing                 |
| salmon                    | lizard                     | painting                  | scissors <sup>m,f,e</sup>    | olive <sup>m,e</sup>     | milk                   | literature             | frisbee                 |
| sardine                   | maggot <sub>f,e</sub>      | piano <sup>m,f,e</sup>    | screw <sub>m,e</sub>         | onion                    | parsley <sup>m,f</sup> | mathematics            | hiking                  |
| sea horse <sup>e</sup>    | mosquito                   | pillow                    | screwdriver                  | orange                   | peanut                 | medicine               | hunting <sup>m</sup>    |
| seal                      | moth                       | plate                     | sewing needle <sup>f,e</sup> | pine cone                | pineapple              | meteorology            | jogging                 |
| shark                     | scorpion <sup>f,e</sup>    | refrigerator              | shovel                       | pomegranate <sub>m</sub> | potato                 | mineralogy             | kite flying             |
| shrimp                    | silkworm                   | rug <sub>f</sub>          | stone <sub>m</sub>           | pumpkin                  | rice                   | nutrition              | mountaineering          |
| sponge                    | snail                      | shelf                     | string                       | rhubarb                  | sage                   | palm reading           | picnicking              |
| squid <sup>m,f,e</sup>    | spider <sup>m,f,e</sup>    | suitcase                  | toothbrush                   | strawberry               | seaweed                | pharmacy               | skiing                  |
| starfish                  | tapeworm                   | table                     | tractor                      | sugar beet               | soybean <sub>f,e</sub> | philosophy             | surfing                 |
| tadpole                   | tarantula <sup>f</sup>     | telephone                 | trunk                        | tomato <sub>f,e</sub>    | spinach                | psychology             | swimming                |
| trout                     | termite                    | television <sup>f,e</sup> | umbrella                     | walnut <sup>m,f,e</sup>  | turnip                 | religious studies      | tennis                  |
| whale                     | wasp                       | waste basket              | varnish                      | watermelon <sub>m</sub>  | watercress             | sociology              | weightlifting           |
|                           |                            |                           |                              |                          |                        |                        | wrestling               |
